# Supplementary material for: Relationship Among Chlamydia and Mycoplasma Pneumoniae Seropositivity, IKZF1 Genotype and Chronic Obstructive Pulmonary Disease in A General Japanese Population: The Nagahama Study
Source: PubMed Central journal article supplement (PMC4839845; doi:10.1097/md.0000000000003371), 2016-04-18
Supplement: medi-95-e3371-s001.pdf [file medi-95-e3371-s001.pdf]

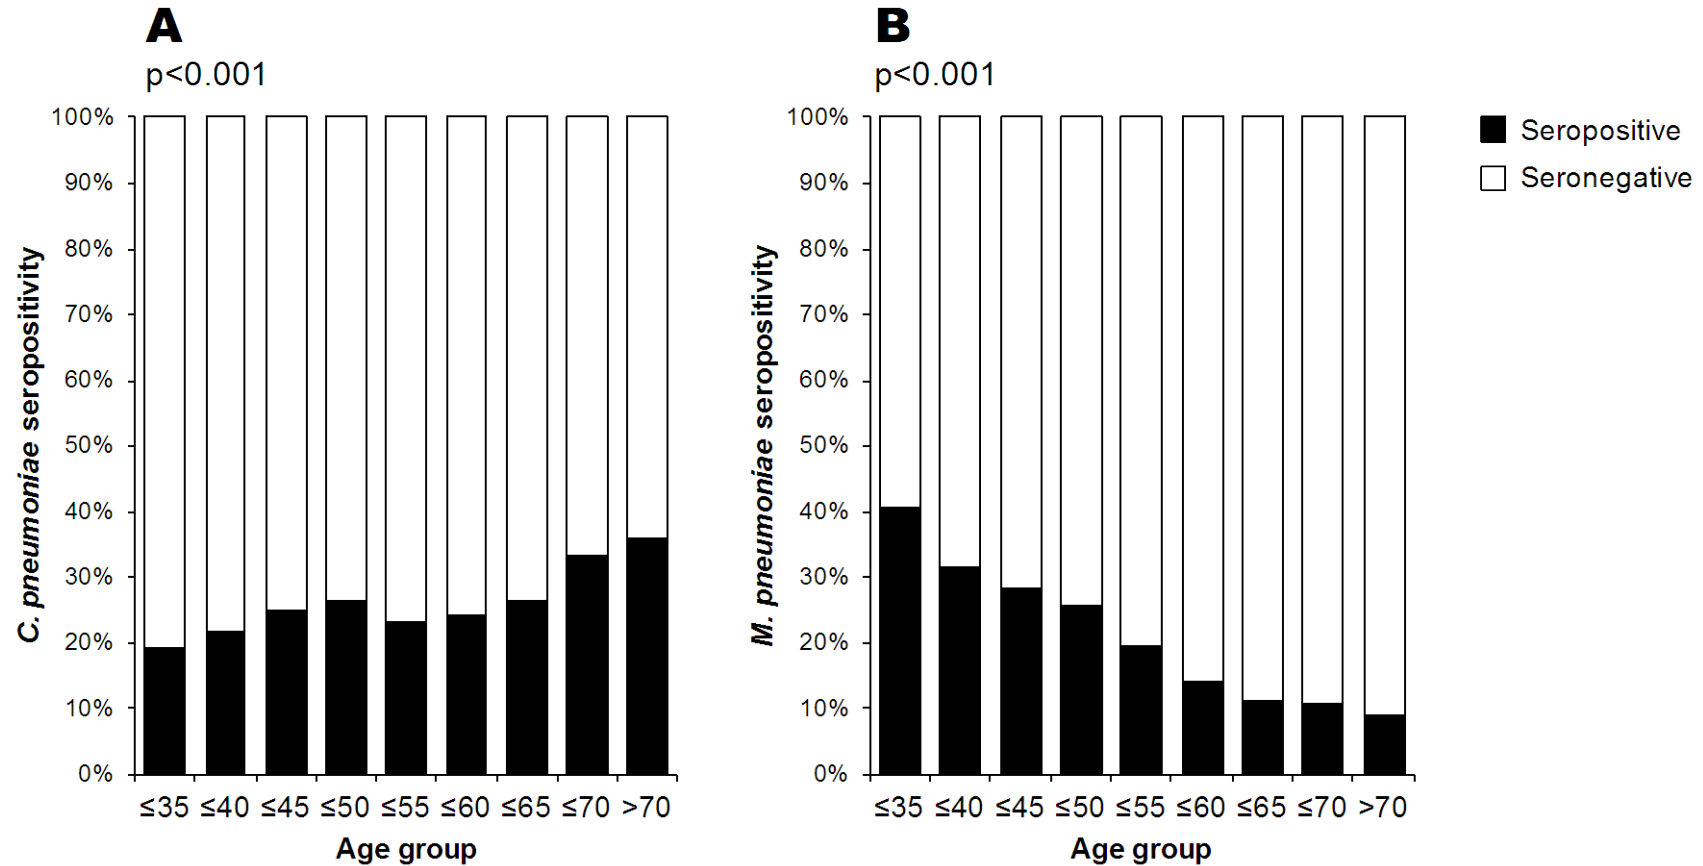

**Supplementary Figure 1.** *C. pneumoniae* and *M. pneumoniae* seropositivity by age group

**A:** *C. pneumoniae*, **B:** *M. pneumoniae*.

Seropositivity for *C. pneumoniae* was defined as both IgA and IgG index values of more than 1.1. Titers of antibody to *M. pneumoniae* greater than 1:40 were considered as seropositive. *P*-values adjusted for age, sex, body height, body weight, and smoking habit were calculated by multiple regression analyses.

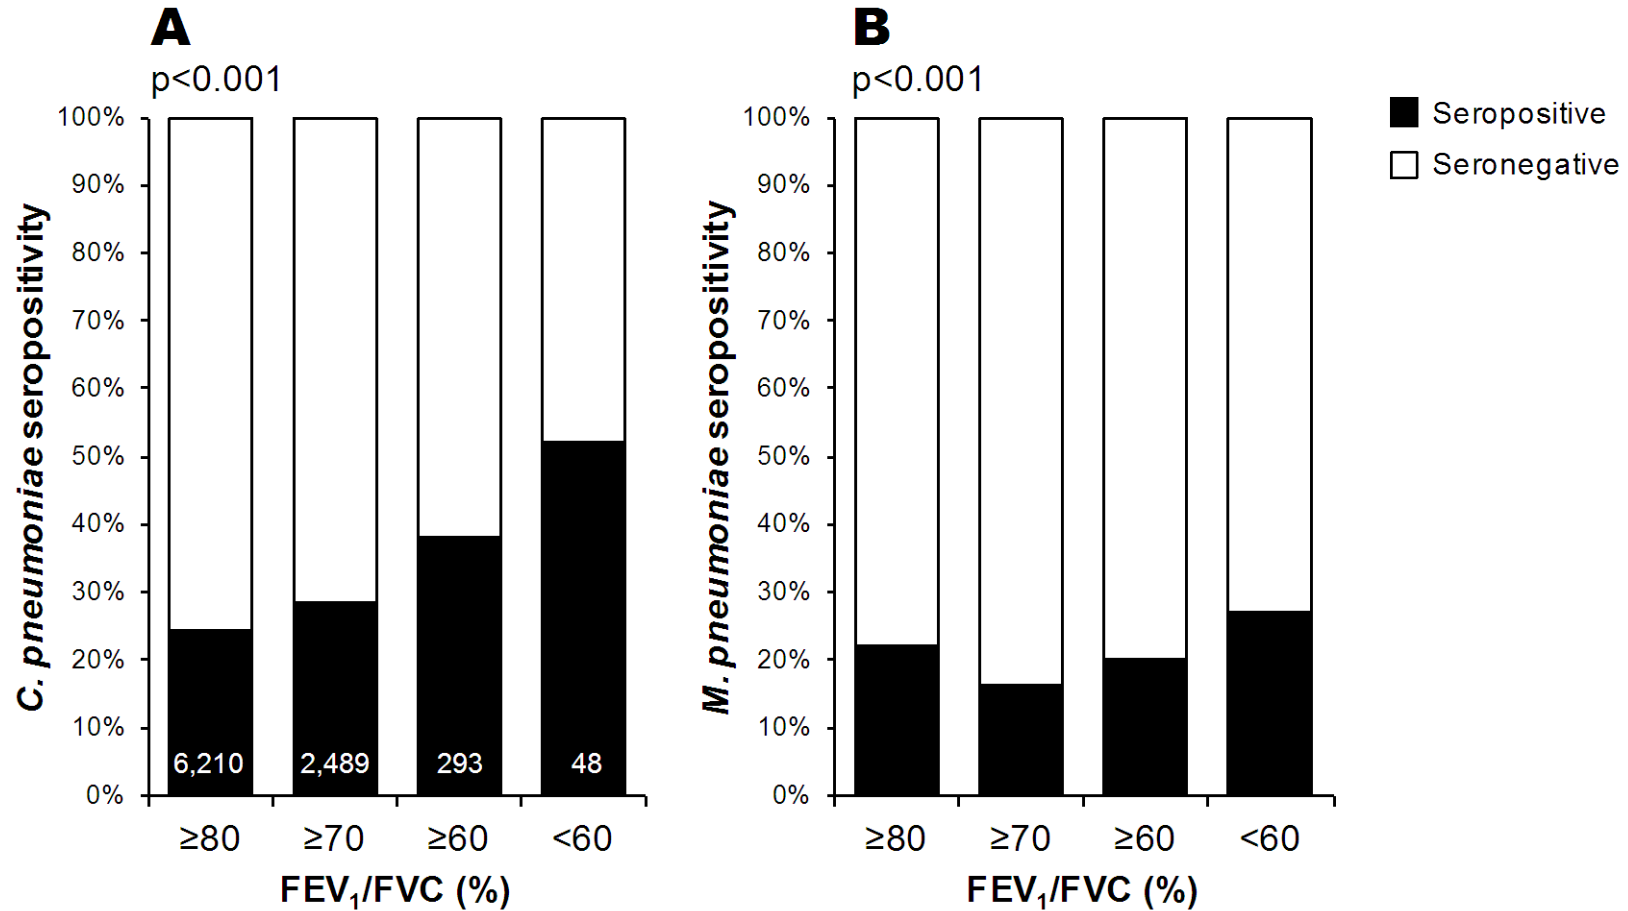

**Supplementary Figure 2.** *C. pneumoniae* and *M. pneumoniae* seropositivity by pulmonary function.

**A:** *C. pneumoniae*, **B:** *M. pneumoniae*.

Seropositivity for *C. pneumoniae* was defined as both IgA and IgG index values of more than 1.1. Titers of antibody to *M. pneumoniae* greater than 1:40 were considered as seropositive. Frequency difference was assessed by a chi-squared test.

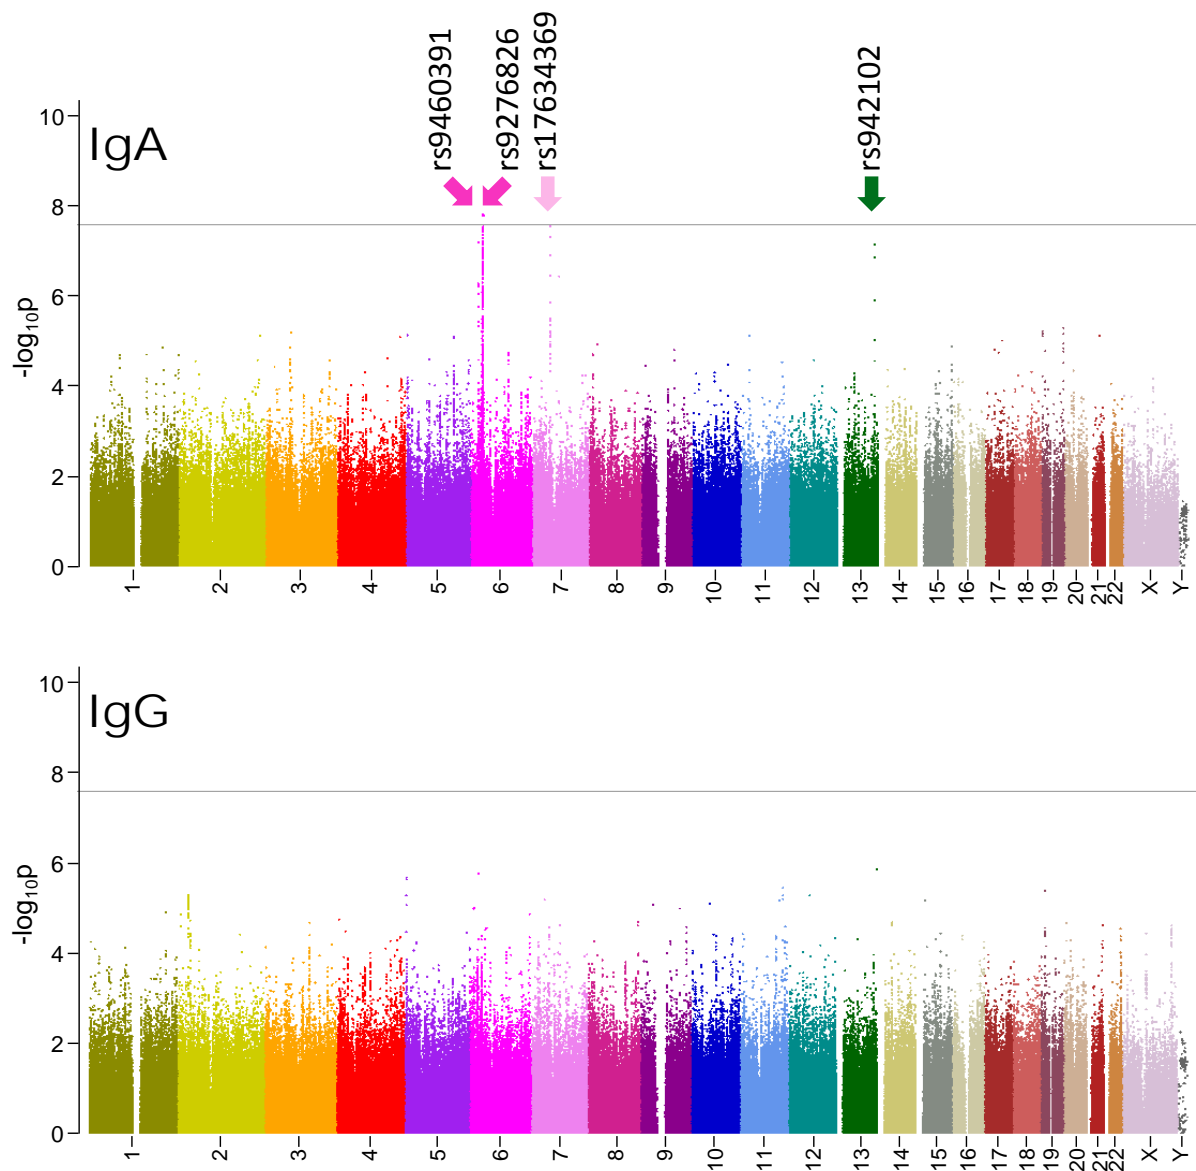

**Supplementary Figure 3.** Manhattan plots of population stratification-unadjusted association analysis of *C. pneumoniae* IgA and IgG indices

Rank-based inverse normal transformation was applied to serum values of the *C. pneumoniae* IgA and IgG indices to normalize their distributions. Adjusted factors in the association analysis were age, age squared, sex, and BMI. Association analysis was performed using PLINK v1.07 software.

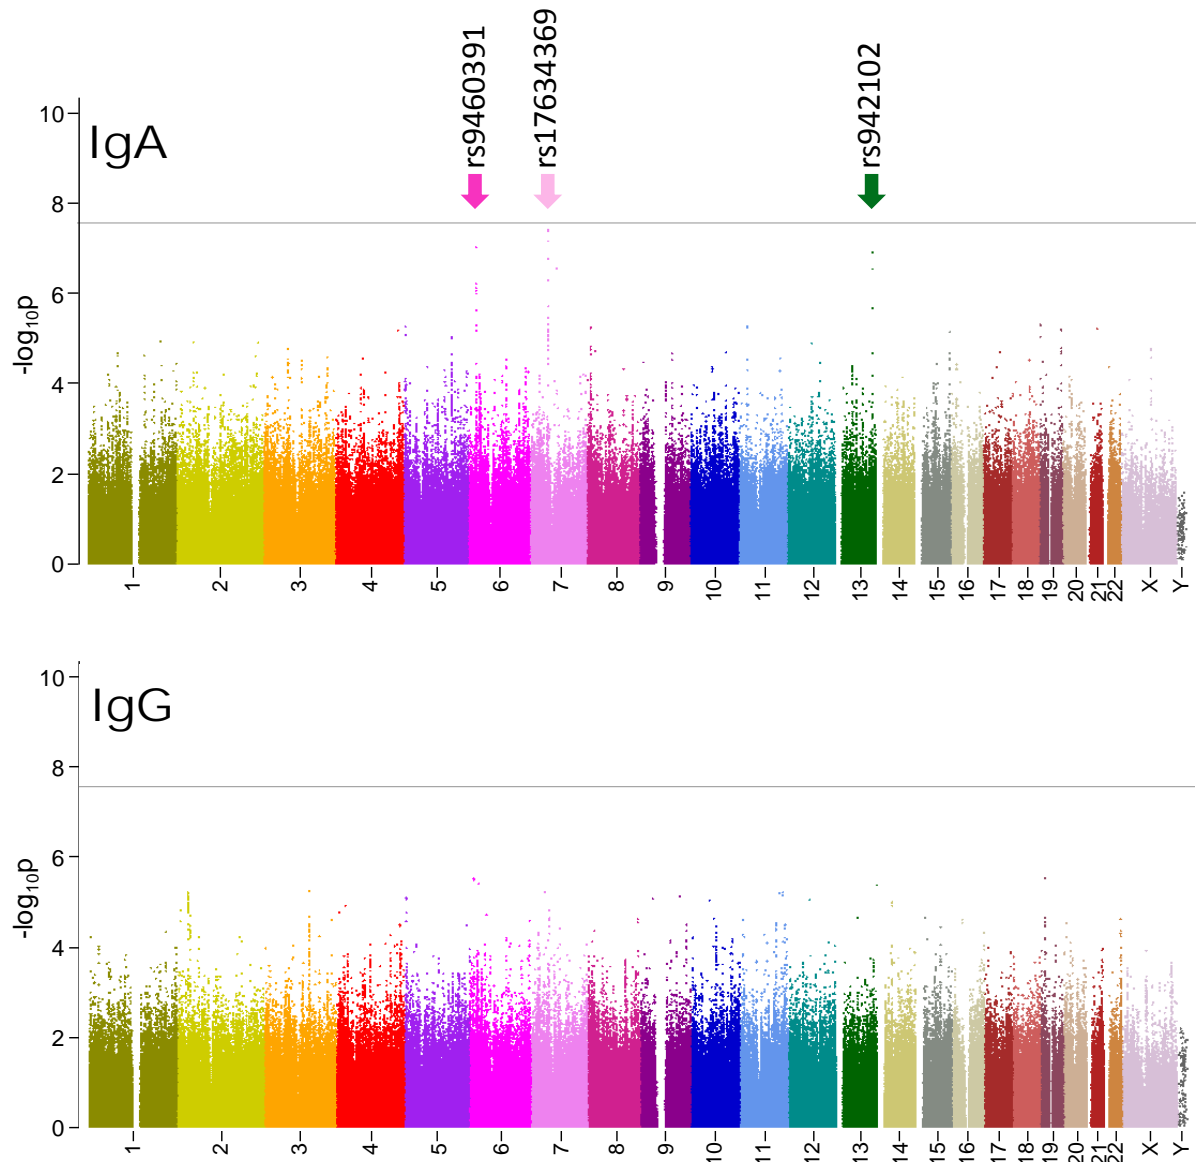

**Supplementary Figure 4.** Manhattan plots of population stratification-adjusted association analysis for *C. pneumoniae* IgA and IgG indices

Rank-based inverse normal transformation was applied to serum the values of the *C. pneumoniae* IgA and IgG indices to normalize their distributions. Adjusted factors in the association analysis were age, age squared, sex, and BMI. Population stratifications were corrected by principal components analysis<sup>11</sup>. Association analysis was performed using PLINK v1.07 software.

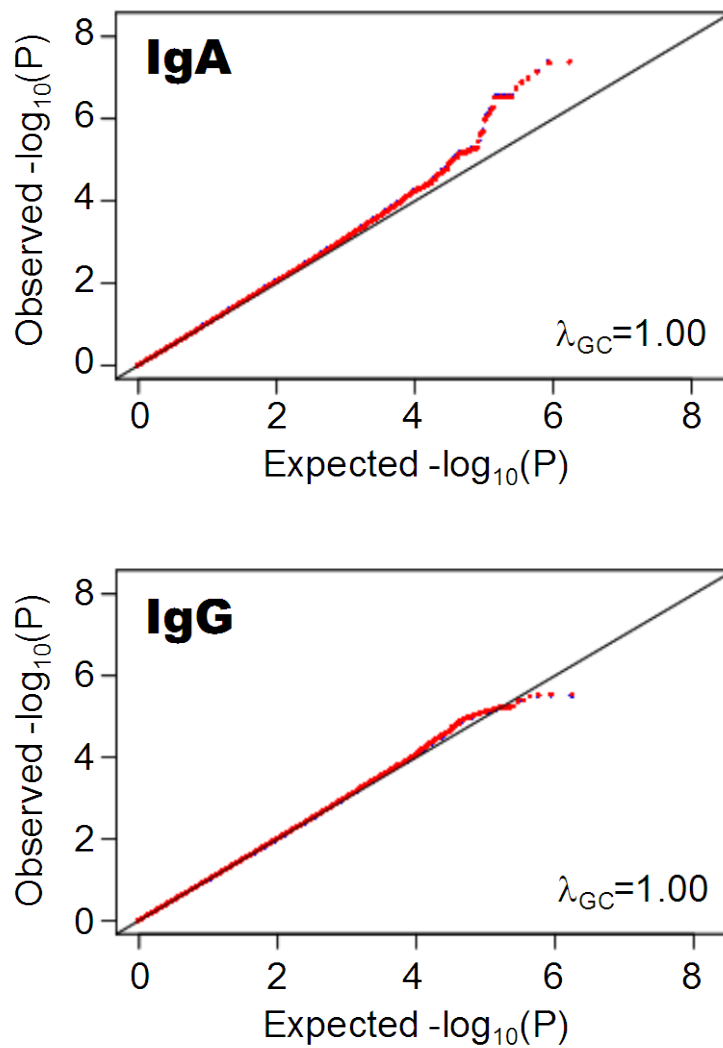

**Supplementary Figure 5.** Quantile-Quantile plots of the population stratification-adjusted association analysis for *C. pneumoniae* IgA and IgG indices

The Quantile-Quantile plot (QQ-plot) for the  $P$ -values of all SNPs that passed quality control criteria and for the  $P$ -values corrected for genomic control factor are indicated by blue and red dots, respectively. Lambda values before genomic control correction ( $\lambda_{GC}$ ) are shown in each graph.

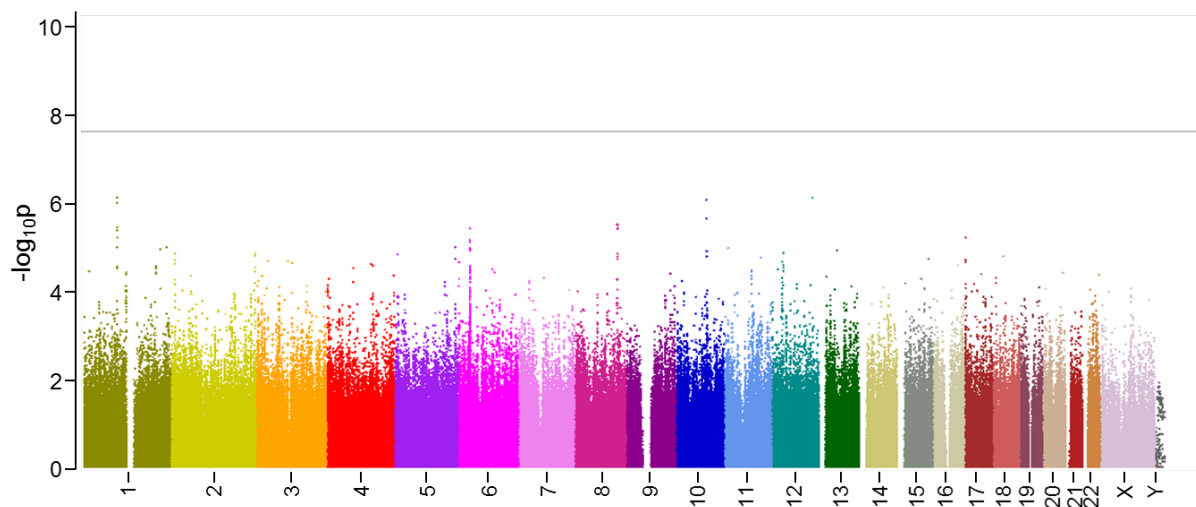

**Supplementary Figure 6.** Manhattan plots of population stratification-unadjusted association analysis for *M. pneumoniae* seropositivity

Titers of more than 1:40 were considered as seropositive. Association analysis was performed using PLINK v1.07 software.

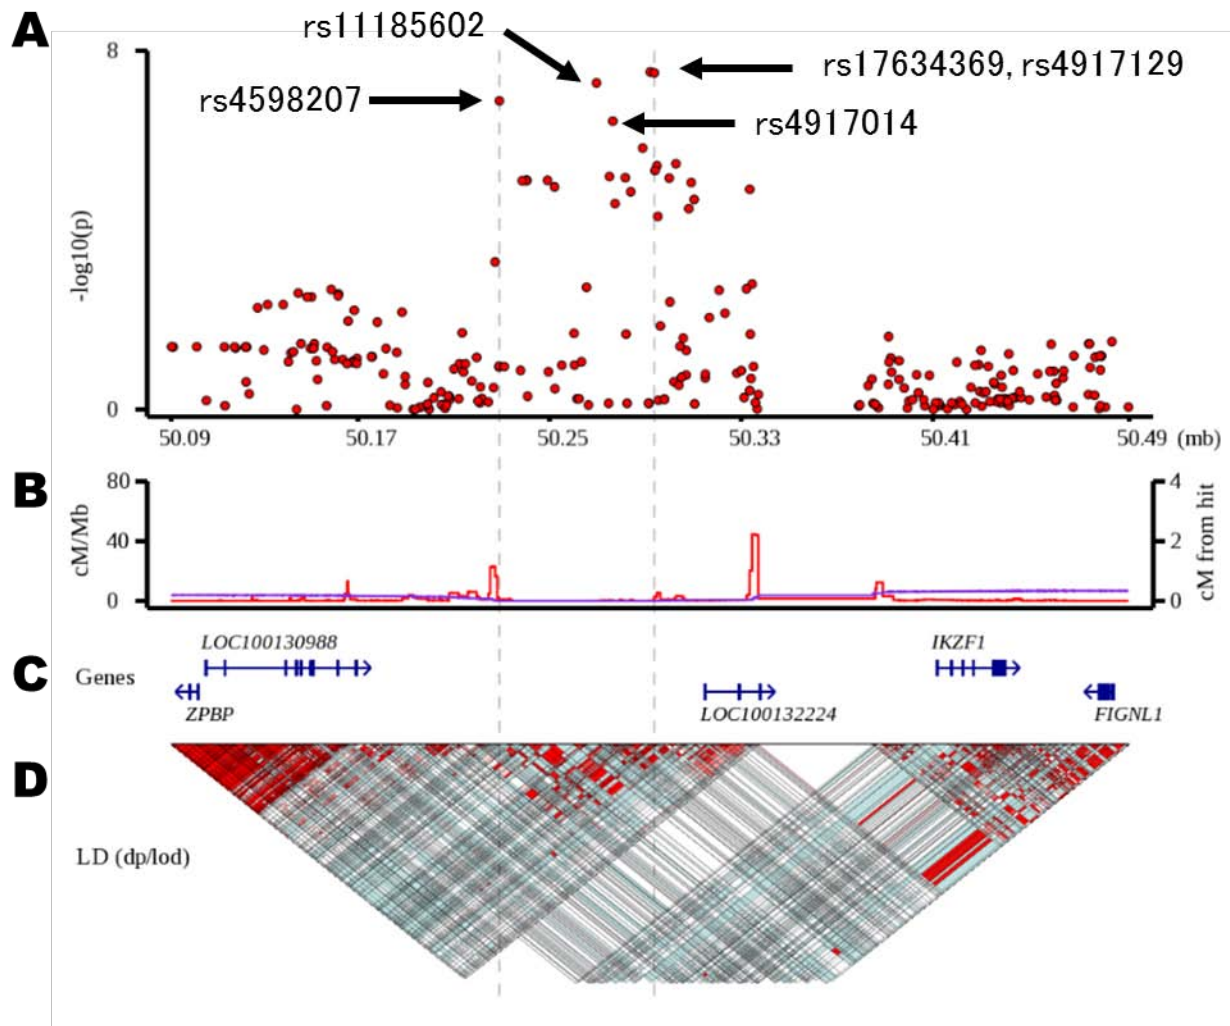

**Supplementary Figure 7.** Regional association plots of loci around the SNP rs17634369

**A:**  $P$ -values ( $-\log_{10}(p)$ ) of genotyped SNPs around 200 kb to either side of the most strongly associated signal are shown in red dots. Genomic positions are based on NCBI reference sequence build 36 and dbSNP build 126. **B:** Red line indicates the recombination rate (cM/Mb) estimated from a HapMap JPT (release 28) dataset. Purple line indicates cumulative genetic distance (in cM) from the strongest signal. Signal boundaries (vertical dotted lines) were chosen using the recombination hot spots flanking the strongest signal. **C:** Blue lines (intron) and boxes (exon) indicate the locations of known genes. **D:** Linkage disequilibrium (LD) map calculated using the Hapmap JPT dataset.

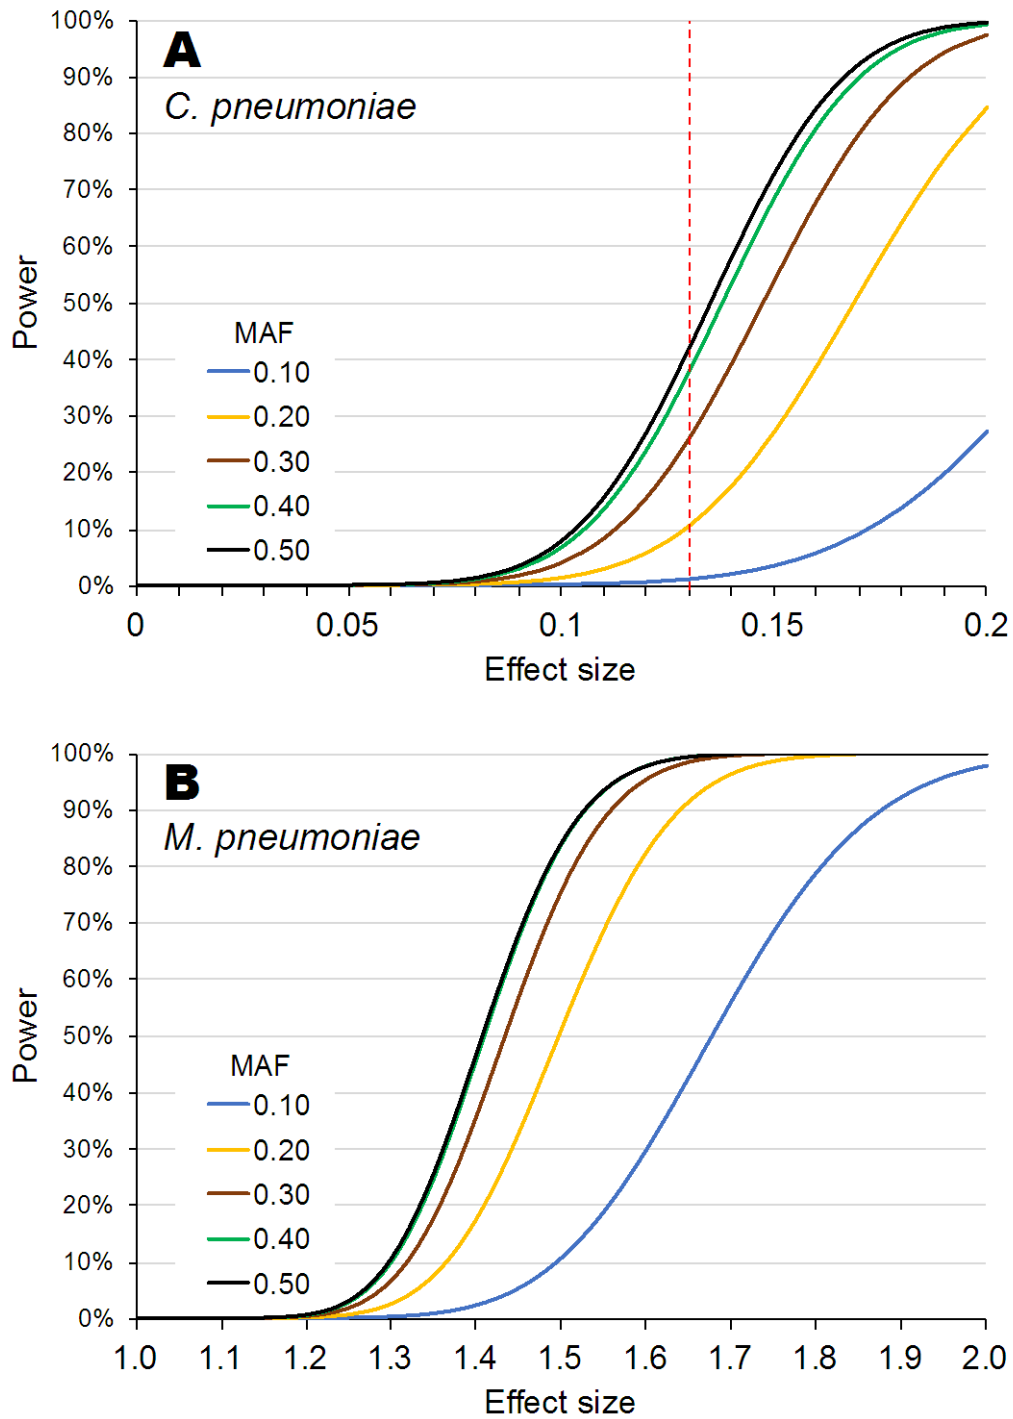

**Supplementary Figure 8.** Statistical power of the present GWAS

Statistical power of the present GWAS of *C. pneumoniae* IgA and IgG indices (mean=0, standard deviation=1) and *M. pneumoniae* seropositivity (case:unmatched control=1:3.9) was calculated under additive genetic model using Quanto software<sup>12, 13</sup>. Red dotted line indicates presently found rs17634369 SNP.



**Supplementary Table 1** Clinical characteristics of study subjects

|                                      | GWAS<br>(n=3,246) | Replication<br>(n=5,991) |
|--------------------------------------|-------------------|--------------------------|
| Age (years)                          | 52±14             | 54±13                    |
| Sex (male/female)                    | 1,092/2,154       | 1,930/4,061              |
| Body mass index (kg/m <sup>2</sup> ) | 22.3±3.1          | 22.3±3.3                 |
| Smoking (current/past/never)         | 540/654/2,052     | 795/1,236/3,960          |
| <i>C. pneumoniae</i> IgA index       | 1.00±0.64         | 0.99±0.64                |
| <i>C. pneumoniae</i> IgG index       | 1.13±0.71         | 1.23±0.76                |

Among a total of 9,804 subjects, genome-wide SNP genotype data was available for 3,710 subjects. Samples of participants meeting any of the following conditions were excluded from the analysis; a call rate less than 95% (n=162), showed high degrees of kinship (n=295), and ancestry outliers (n=7). Among a remaining samples, a total of 5,991 samples were available for replication analysis.

**Supplementary Table 2.** Differences in clinical parameters by severity of pulmonary function.

|                  |                                      | FEV <sub>1</sub> /FVC (%) |          |          |          | <i>P</i> |
|------------------|--------------------------------------|---------------------------|----------|----------|----------|----------|
|                  |                                      | ≥80%                      | ≥70%     | ≥60%     | <60%     |          |
| Male (n=2,953)   | n                                    | 1,587                     | 1,158    | 171      | 37       |          |
|                  | Frequency of COPD (%)                |                           | 93.0     |          | 7.0      |          |
|                  | Age (years)                          | 52±14                     | 59±12    | 63±9     | 65±9     | <0.001   |
|                  | Body mass index (kg/m <sup>2</sup> ) | 23.7±3.2                  | 23.1±2.7 | 22.7±2.7 | 21.6±2.9 | <0.001   |
|                  | Smoking (current or past, %)         | 71.5                      | 78.7     | 81.3     | 94.6     | <0.001   |
|                  | Medication for COPD (%)              | 0.1                       | 0.2      | 1.2      | 18.9     | <0.001   |
|                  | Medication for asthma (%)            | 0.4                       | 0.8      | 2.9      | 2.7      | 0.199    |
| Female (n=6,087) | n                                    | 4,623                     | 1,331    | 122      | 11       |          |
|                  | Frequency of COPD (%)                |                           | 97.8     |          | 2.2      |          |
|                  | Age (years)                          | 52±13                     | 56±12    | 55±14    | 61±13    | <0.001   |
|                  | Body mass index (kg/m <sup>2</sup> ) | 21.9±3.4                  | 21.3±2.8 | 20.8±2.4 | 21.3±3.3 | <0.001   |
|                  | Smoking (current or past, %)         | 15.4                      | 13.9     | 18.9     | 27.3     | 0.227    |
|                  | Medication for COPD (%)              | 0.1                       | 0.3      | 0.8      | 0        | 0.031    |
|                  | Medication for asthma (%)            | 0.5                       | 1.2      | 7.4      | 0        | 0.232    |

Values are mean ± standard deviation.

FEV<sub>1</sub>, forced expiratory volume in 1 sec; FVC, forced vital capacity; COPD, chronic obstructive pulmonary disease. COPD was defined as a ratio of FEV<sub>1</sub> to FVC of less than 70%.

Differences in clinical parameters were assessed by analysis of variance, while differences in frequencies were evaluated by a chi-square test.

**Supplementary Table 3.** Differences in clinical parameters by *C. pneumoniae* and *M. pneumoniae* seropositivity (n=8,950)

|                                  | <i>C. pneumoniae</i>    |                         |          |          | <i>M. pneumoniae</i>    |                         |          |          |
|----------------------------------|-------------------------|-------------------------|----------|----------|-------------------------|-------------------------|----------|----------|
|                                  | Seronegative<br>(6,623) | Seropositive<br>(2,327) | <i>P</i> |          | Seronegative<br>(7,128) | Seropositive<br>(1,822) | <i>P</i> |          |
|                                  |                         |                         | Crude    | Adjusted |                         |                         | Crude    | Adjusted |
| FVC (L)                          | 3.26±0.84               | 3.23±0.80               | 0.057    | <0.001   | 3.24±0.84               | 3.32±0.80               | <0.001   | 0.251    |
| FVC % predicted (%)              | 105±15                  | 103±15                  | <0.001   | 0.001    | 105±15                  | 104±15                  | 0.481    | 0.493    |
| FEV <sub>1</sub> (L)             | 2.69±0.68               | 2.62±0.65               | <0.001   | <0.001   | 2.65±0.67               | 2.76±0.65               | <0.001   | 0.033    |
| FEV <sub>1</sub> /FVC (%)        | 82.7±6.3                | 81.4±6.9                | <0.001   | <0.001   | 82.1±6.3                | 83.4±7.0                | <0.001   | 0.164    |
| FEV <sub>1</sub> % predicted (%) | 104±16                  | 102±17                  | <0.001   | 0.003    | 104±16                  | 103±16                  | 0.087    | 0.149    |
| COPD (%)                         | 2.9                     | 5.5                     | <0.001   | 0.003    | 3.6                     | 3.6                     | 0.904    | 0.003    |

Subjects under treatment for asthma or chronic obstructive pulmonary disease (COPD) (n=90) were excluded from analysis.

Values are mean ± standard deviation.

Seropositivity for *C. pneumoniae* was defined as both IgA and IgG index values of more than 1.1. Titers of antibody to *M. pneumoniae* greater than 1:40 were considered as seropositive. COPD was defined as a ratio of FEV<sub>1</sub> to FVC of less than 70%.

Differences in clinical parameters were assessed by analysis of variance, while differences in frequencies were evaluated by a chi-square test.

*P*-values adjusted for age, sex, body height, body weight, and Brinkman index were calculated by multiple regression analyses.

**Supplementary Table 4.** Top-hit SNPs in GWAS of *C. pneumoniae* IgA index value

| Chr | rs Number  | GWAS                   |                  |                   |                       | Replication      |                  |                       | Combined         |                  |                        |
|-----|------------|------------------------|------------------|-------------------|-----------------------|------------------|------------------|-----------------------|------------------|------------------|------------------------|
|     |            | Coded allele<br>(freq) | n<br>(HWE p)     | Beta<br>(s.e.)    | <i>P</i>              | n<br>(HWE p)     | Beta<br>(s.e.)   | <i>P</i>              | n<br>(HWE p)     | Beta<br>(s.e.)   | <i>P</i>               |
| 6   | rs9460391  | T<br>(0.196)           | 3,246<br>(0.857) | 0.163<br>(0.030)  | $6.90 \times 10^{-8}$ | 5,885<br>(0.506) | 0.018<br>(0.023) | 0.414                 |                  |                  |                        |
| 7   | rs17634369 | G<br>(0.558)           | 3,246<br>(0.713) | 0.134<br>(0.024)  | $2.96 \times 10^{-8}$ | 5,900<br>(0.543) | 0.080<br>(0.018) | $1.36 \times 10^{-5}$ | 9,146<br>(0.479) | 0.099<br>(0.015) | $1.32 \times 10^{-11}$ |
| 13  | rs942102   | C<br>(0.342)           | 3,246<br>(0.117) | -0.134<br>(0.025) | $7.73 \times 10^{-8}$ | 5,928<br>(0.960) | 0.010<br>(0.019) | 0.621                 |                  |                  |                        |

*C. pneumoniae* IgA index value was transformed by rank-based inverse normal transformation. Beta and *P*-values in the additive regression models adjusted for age, age squared, sex, and BMI are shown. Combined analysis was performed using individual data. HWE, Hardy-Weinberg equilibrium; s.e., standard error.

**Supplementary Table 5.** Associations between known genotypes susceptible for systemic lupus erythematosus and *C. pneumoniae* IgA index values

| Locus | SNPs for SLE  |            | <i>C. pneumoniae</i> IgA index value |       |          |
|-------|---------------|------------|--------------------------------------|-------|----------|
|       | Gene          | rs No.     | beta                                 | Se    | <i>P</i> |
| 1q25  | TNFSF4        | rs2205960  | -0.001                               | 0.031 | 0.967    |
| 1q31  | IL10          | rs3024505  | 0.162                                | 0.094 | 0.084    |
| 2p13  | TET3          | rs6705628  | 0.004                                | 0.031 | 0.893    |
| 2p22  | RASGRP3       | rs13385731 | 0.056                                | 0.034 | 0.099    |
| 2q32  | STAT4         | rs7574865  | 0.036                                | 0.025 | 0.148    |
| 3p14  | PXK           | rs6445975  | -0.044                               | 0.029 | 0.128    |
| 3q13  | TMEM39A-CD80  | rs6804441  | -0.013                               | 0.026 | 0.615    |
| 4q21  | AFF1          | rs340630   | 0.026                                | 0.024 | 0.296    |
| 4q24  | BANK1         | rs10516487 | -0.005                               | 0.041 | 0.909    |
| 5q33  | TNIP1         | rs10036748 | 0.025                                | 0.027 | 0.367    |
| 6p21  | UHRF1BP1      | rs11755393 | -0.020                               | 0.026 | 0.452    |
| 6p21  | HLA region    | rs9501626  | -0.048                               | 0.038 | 0.212    |
| 6q21  | PRDM1-ATG5    | rs548234   | 0.015                                | 0.026 | 0.556    |
| 6q23  | TNFAIP3       | rs2230926  | -0.142                               | 0.047 | 0.003    |
| 7q11  | HIP1          | rs6964720  | -0.026                               | 0.029 | 0.378    |
| 7q32  | IRF5          | rs4728142  | 0.001                                | 0.039 | 0.972    |
| 8p23  | BLK           | rs2254546  | -0.003                               | 0.026 | 0.916    |
| 10q11 | LRRC18-WDFY4  | rs1913517  | 0.028                                | 0.027 | 0.305    |
| 10q21 | ARID5B        | rs4948496  | -0.014                               | 0.025 | 0.557    |
| 11p13 | CD44          | rs2732552  | -0.027                               | 0.027 | 0.315    |
| 11p15 | PHRF1         | rs4963128  | 0.002                                | 0.063 | 0.976    |
| 11q23 | CXCR5         | rs10892301 | 0.002                                | 0.025 | 0.950    |
| 11q23 | ETS1          | rs1128334  | 0.065                                | 0.025 | 0.010    |
| 11q23 | PHLDB1        | rs11603023 | 0.026                                | 0.028 | 0.362    |
| 12p13 | CREBL2-CDKN1B | rs10845606 | 0.004                                | 0.029 | 0.902    |
| 12q23 | DRAM1         | rs4622329  | 0.017                                | 0.024 | 0.475    |
| 12q24 | SLC15A4       | rs1385374  | 0.012                                | 0.032 | 0.716    |
| 16p11 | ITGAM         | rs7197475  | -0.059                               | 0.040 | 0.141    |
| 16q24 | IRF8          | rs11644034 | 0.083                                | 0.037 | 0.025    |
| 22q11 | HIC2-UBE2L3   | rs463426   | 0.010                                | 0.024 | 0.672    |

*C. pneumoniae* IgA index values were transformed by rank-based inverse normal transformation, and association analysis in the GWAS sample (Supplemental Table 1) was performed by linear regression analysis under additive genetic model adjusted for age, age squared, sex, and BMI (PLINK, v1.07)<sup>1</sup>.

Genetic loci that have been validated to be associated with systemic lupus erythematosus (SLE) ( $p < 5.0 \times 10^{-8}$ ) by previous genome-wide association studies<sup>2-10</sup> were selected.

**Supplementary Table 6.** Multiple logistic regression analysis for COPD (n=8,950)

|                                   | Odds (95% C.I.)  | <i>P</i> |
|-----------------------------------|------------------|----------|
| Age (10 years)                    | 1.67 (1.48-1.89) | <0.001   |
| Sex (male)                        | 1.16 (0.77-1.73) | 0.479    |
| Body height (cm)                  | 1.09 (1.06-1.11) | <0.001   |
| Body weight (kg)                  | 0.95 (0.94-0.97) | <0.001   |
| Brinkman index (100 index)        | 1.10 (1.07-1.13) | <0.001   |
| <i>C. pneumoniae</i> seropositive | 1.41 (1.11-1.80) | 0.005    |
| <i>M. pneumoniae</i> seropositive | 1.54 (1.14-2.07) | 0.005    |
| rs17634369 genotype (per allele)  | 1.11 (0.94-1.31) | 0.227    |

Subjects under treatment for asthma or chronic obstructive pulmonary disease (COPD) (n=90) were excluded from analysis.

C.I., confidence interval.

## REFERENCES

1. Purcell S, Neale B, Todd-Brown K, Thomas L, Ferreira MA, Bender D, Maller J, Sklar P, de Bakker PI, Daly MJ, Sham PC. PLINK: a tool set for whole-genome association and population-based linkage analyses. *Am J Hum Genet.* 2007;**81**:559-575.
2. Kozyrev SV, Abelson AK, Wojcik J, Zaghlool A, Linga Reddy MV, Sanchez E, Gunnarsson I, Svenungsson E, Sturfelt G, Jönsen A, Truedsson L, Pons-Estel BA, Witte T, D'Alfonso S, Barizzone N, Danieli MG, Gutierrez C, Suarez A, Junker P, Lastrup H, González-Escribano MF, Martin J, Abderrahim H, Alarcón-Riquelme ME. Functional variants in the B-cell gene BANK1 are associated with systemic lupus erythematosus. *Nat Genet.* 2008;**40**:211-216.
3. Han JW, Zheng HF, Cui Y, Sun LD, Ye DQ, Hu Z, Xu JH, Cai ZM, Huang W, Zhao GP, Xie HF, Fang H, Lu QJ, Xu JH, Li XP, Pan YF, Deng DQ, Zeng FQ, Ye ZZ, Zhang XY, Wang QW, Hao F, Ma L, Zuo XB, Zhou FS, Du WH, Cheng YL, Yang JQ, Shen SK, Li J, Sheng YJ, Zuo XX, Zhu WF, Gao F, Zhang PL, Guo Q, Li B, Gao M, Xiao FL, Quan C, Zhang C, Zhang Z, Zhu KJ, Li Y, Hu DY, Lu WS, Huang JL, Liu SX, Li H, Ren YQ, Wang ZX, Yang CJ, Wang PG, Zhou WM, Lv YM, Zhang AP, Zhang SQ, Lin D, Li Y, Low HQ, Shen M, Zhai ZF, Wang Y, Zhang FY, Yang S, Liu JJ, Zhang XJ. Genome-wide association study in a Chinese Han population identifies nine new susceptibility loci for systemic lupus erythematosus. *Nat Genet.* 2009;**41**:1234-1237.
4. Gateva V, Sandling JK, Hom G, Taylor KE, Chung SA, Sun X, Ortmann W, Kosoy R, Ferreira RC, Nordmark G, Gunnarsson I, Svenungsson E, Padyukov L, Sturfelt G, Jönsen A, Bengtsson AA, Rantapää-Dahlqvist S, Baechler EC, Brown EE, Alarcón GS, Edberg JC, Ramsey-Goldman R, McGwin G Jr, Reveille JD, Vilá LM, Kimberly RP, Manzi S, Petri MA, Lee A, Gregersen PK, Seldin MF, Rönnblom L, Criswell LA, Syvänen AC, Behrens TW, Graham RR. A large-scale replication study identifies TNIP1, PRDM1, JAZF1, UHRF1BP1 and IL10 as risk loci for systemic lupus erythematosus. *Nat Genet.*

2009;**41**:1228-1233.

5. Yang W, Shen N, Ye DQ, Liu Q, Zhang Y, Qian XX, Hirankarn N, Ying D, Pan HF, Mok CC, Chan TM, Wong RW, Lee KW, Mok MY, Wong SN, Leung AM, Li XP, Avihingsanon Y, Wong CM, Lee TL, Ho MH, Lee PP, Chang YK, Li PH, Li RJ, Zhang L, Wong WH, Ng IO, Lau CS, Sham PC, Lau YL; Asian Lupus Genetics Consortium. Genome-wide association study in Asian populations identifies variants in ETS1 and WDFY4 associated with systemic lupus erythematosus. *PLoS Genet.* 2010;**6**:e1000841
6. Lessard CJ, Adrianto I, Kelly JA, Kaufman KM, Grundahl KM, Adler A, Williams AH, Gallant CJ; Marta E. Alarcón-Riquelme on behalf of the BIOLUPUS and GENLES Networks, Anaya JM, Bae SC, Boackle SA, Brown EE, Chang DM, Criswell LA, Edberg JC, Freedman BI, Gregersen PK, Gilkeson GS, Jacob CO, James JA, Kamen DL, Kimberly RP, Martin J, Merrill JT, Niewold TB, Park SY, Petri MA, Pons-Estel BA, Ramsey-Goldman R, Reveille JD, Song YW, Stevens AM, Tsao BP, Vila LM, Vyse TJ, Yu CY, Guthridge JM, Bruner GR, Langefeld CD, Montgomery C, Harley JB, Scofield RH, Gaffney PM, Moser KL. Identification of a systemic lupus erythematosus susceptibility locus at 11p13 between PDHX and CD44 in a multiethnic study. *Am J Hum Genet.* 2011;**88**:83-91.
7. Okada Y, Shimane K, Kochi Y, Tahira T, Suzuki A, Higasa K, Takahashi A, Horita T, Atsumi T, Ishii T, Okamoto A, Fujio K, Hirakata M, Amano H, Kondo Y, Ito S, Takada K, Mimori A, Saito K, Kamachi M, Kawaguchi Y, Ikari K, Mohammed OW, Matsuda K, Terao C, Ohmura K, Myouzen K, Hosono N, Tsunoda T, Nishimoto N, Mimori T, Matsuda F, Tanaka Y, Sumida T, Yamanaka H, Takasaki Y, Koike T, Horiuchi T, Hayashi K, Kubo M, Kamatani N, Yamada R, Nakamura Y, Yamamoto K. A genome-wide association study identified AFF1 as a susceptibility locus for systemic lupus erythematosus in Japanese. *PLoS Genet.* 2012;**8**:e1002455.
8. Lessard CJ, Adrianto I, Ice JA, Wiley GB, Kelly JA, Glenn SB, Adler AJ, Li H,



Rasmussen A, Williams AH, Ziegler J, Comeau ME, Marion M, Wakeland BE, Liang C, Ramos PS, Grundahl KM, Gallant CJ, Alarcón-Riquelme ME, Alarcón GS, Anaya JM, Bae SwC, Boackle SA, Brown EE, Chang DM, Cho SK, Criswell LA, Edberg JC, Freedman BI, Gilkeson GS, Jacob CO, James JA, Kamen DL, Kimberly RP, Kim JH, Martin J, Merrill JT, Niewold TB, Park SY, Petri MA, Pons-Estel BA, Ramsey-Goldman R, Reveille JD, Scofield RH, Song YW, Stevens AM, Tsao BP, Vila LM, Vyse TJ, Yu CY, Guthridge JM, Kaufman KM, Harley JB, Wakeland EK, Langefeld CD, Gaffney PM, Montgomery CG, Moser KL; BIOLUPUS Network; GENLES Network. Identification of IRF8, TMEM39A, and IKZF3-ZPBP2 as susceptibility loci for systemic lupus erythematosus in a large-scale multiracial replication study. *Am J Hum Genet.* 2012;**90**:648-660.

9. Yang W, Tang H, Zhang Y, Tang X, Zhang J, Sun L, Yang J, Cui Y, Zhang L, Hirankarn N, Cheng H, Pan HF, Gao J, Lee TL, Sheng Y, Lau CS, Li Y, Chan TM, Yin X, Ying D, Lu Q, Leung AM, Zuo X, Chen X, Tong KL, Zhou F, Diao Q, Tse NK, Xie H, Mok CC, Hao F, Wong SN, Shi B, Lee KW, Hui Y, Ho MH, Liang B, Lee PP, Cui H, Guo Q, Chung BH, Pu X, Liu Q, Zhang X, Zhang C, Chong CY, Fang H, Wong RW, Sun Y, Mok MY, Li XP, Avihingsanon Y, Zhai Z, Rianthavorn P, Deekajorndej T, Suphapeetiporn K, Gao F, Shotelersuk V, Kang X, Ying SK, Zhang L, Wong WH, Zhu D, Fung SK, Zeng F, Lai WM, Wong CM, Ng IO, Garcia-Barceló MM, Cherny SS, Shen N, Tam PK, Sham PC, Ye DQ, Yang S, Zhang X, Lau YL. Meta-analysis followed by replication identifies loci in or near CDKN1B, TET3, CD80, DRAM1, and ARID5B as associated with systemic lupus erythematosus in Asians. *Am J Hum Genet.* 2013;**92**:41-51.
10. Zhang J, Zhang Y, Yang J, Zhang L, Sun L, Pan HF, Hirankarn N, Ying D, Zeng S, Lee TL, Lau CS, Chan TM, Leung AM, Mok CC, Wong SN, Lee KW, Ho MH, Lee PP, Chung BH, Chong CY, Wong RW, Mok MY, Wong WH, Tong KL, Tse NK, Li XP, Avihingsanon Y, Rianthavorn P, Deekajorndej T, Suphapeetiporn K, Shotelersuk V, Ying SK, Fung SK, Lai

WM, Garcia-Barceló MM, Cherny SS, Tam PK, Cui Y, Sham PC, Yang S, Ye DQ, Zhang XJ, Lau YL, Yang W. Three SNPs in chromosome 11q23.3 are independently associated with systemic lupus erythematosus in Asians. *Hum Mol Genet.* 2013 in press.

11. Price AL, Patterson NJ, Plenge RM, Weinblatt ME, Shadick NA, Reich D. Principal components analysis corrects for stratification in genome-wide association studies. *Nat Genet.* 2006;**38**:904-909.
12. Gauderman WJ. Sample size requirements for association studies of gene-gene interaction. *Am J Epidemiol.* 2002;155:478-484.
13. Gauderman WJ. Sample size requirements for matched case-control studies of gene-environment interaction. *Stat Med.* 2002;21:35-50.
